# Supplementary material for: Optical aberrations following implantation of multifocal intraocular lenses: a systematic review and meta-analysis protocol
Source: HighWire-hosted journal article supplement (doi:10.1136/bmjopen-2021-059350), 2022-08-01
Supplement: bmjopen-2021-059350supp001_data_supplement.pdf [file bmjopen-2021-059350supp001_data_supplement.pdf]

**Ovid Medline**

| Search Lines | Search Terms                                                                                                         |
|--------------|----------------------------------------------------------------------------------------------------------------------|
| 1            | exp "Optics and Photonics"/                                                                                          |
| 2            | (optic* or photonic*).mp.                                                                                            |
| 3            | 1 or 2                                                                                                               |
| 4            | exp Refractive Errors/ or exp Refraction, Ocular/ or exp Astigmatism/ or exp Myopia/ or exp Visual Acuity/           |
| 5            | (aberrat* or diffract* or refract* or HOA).mp.                                                                       |
| 6            | 4 or 5                                                                                                               |
| 7            | exp Lenses, Intraocular/                                                                                             |
| 8            | (intraocular lens or Intra-ocular lens or intra ocular lens or IOL or IOLs or lens prosthes* or artificial lens).mp. |
| 9            | 7 or 8                                                                                                               |
| 10           | (multifocal or multi focal or multi-focal or bifocal or bi-focal or trifocal or tri-focal or hybrid).mp.             |
| 11           | 3 and 6 and 9 and 10                                                                                                 |

**Ovid Embase**

| Search Lines | Search Terms                                                                                                         |
|--------------|----------------------------------------------------------------------------------------------------------------------|
| 1            | exp optics/                                                                                                          |
| 2            | (optic* or photonic*).mp                                                                                             |
| 3            | 1 or 2                                                                                                               |
| 4            | exp eye refraction/                                                                                                  |
| 5            | (aberrat* or diffract* or refract* or HOA).mp                                                                        |
| 6            | 4 or 5                                                                                                               |
| 7            | exp lens implant/                                                                                                    |
| 8            | (intraocular lens or Intra-ocular lens or intra ocular lens or IOL or IOLs or lens prosthes* or artificial lens).mp. |
| 9            | 7 or 8                                                                                                               |
| 10           | (multifocal or multi focal or multi-focal or bifocal or bi-focal or trifocal or tri-focal or hybrid).mp              |
| 11           | 3 and 6 and 9 and 10                                                                                                 |
